# Supplementary material
Source: Springer Nature journal article supplement (https://www.springermedizin.de/resource/supplementary/12905_2009_190_MOESM6_ESM.pdf/9518138)

# Daily calcium intake in premenopausal and postmenopausal women

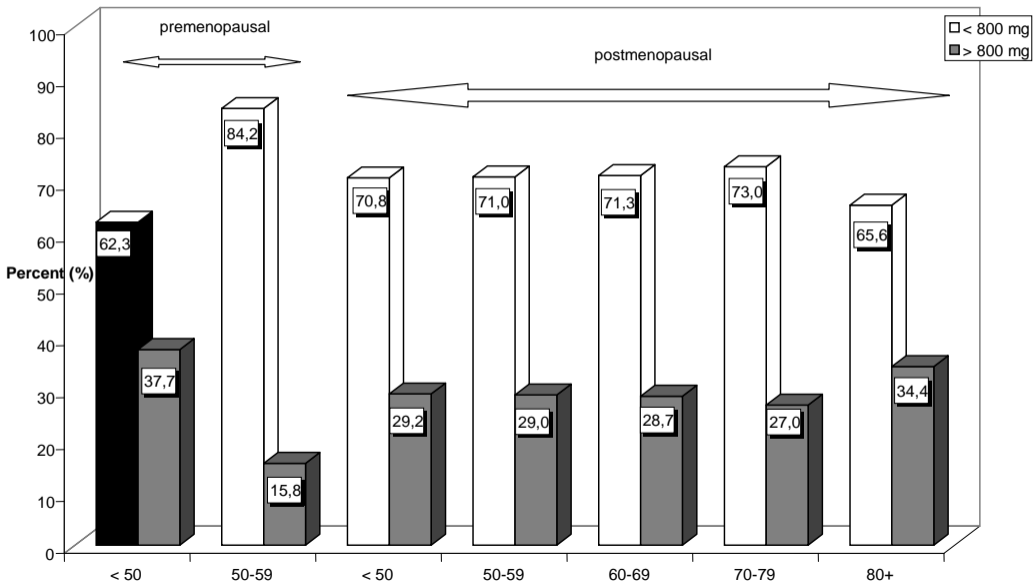

Supplement: MOESM6 [file 9518138]
